# Supplementary material
Source: ML conference proceedings conference paper supplement (https://proceedings.neurips.cc/paper_files/paper/2023/hash/02a92b52670752daf17b53f04f1ab405-Abstract.html)
Supplement: Supplementary file 1 [file 02a92b52670752daf17b53f04f1ab405-Supplemental-Conference.pdf]

---

# Tight Bounds for Volumetric Spanners and Applications

---

Anonymous Author(s)

Affiliation

Address

email

## Abstract

1        Given a set of points of interest, a volumetric spanner is a subset of the points using  
2        which all the points can be expressed using “small” coefficients (measured in an  
3        appropriate norm). Formally, given a set of vectors  $X = \{v_1, v_2, \dots, v_n\}$ , the goal  
4        is to find  $T \subseteq [n]$  such that every  $v \in X$  can be expressed as  $\sum_{i \in T} \alpha_i v_i$ , with  $\|\alpha\|$   
5        being small. This notion, which has also been referred to as a well-conditioned  
6        basis, has found several applications, including bandit linear optimization, deter-  
7        minant maximization, and matrix low rank approximation. In this paper, we give  
8        almost optimal bounds on the size of volumetric spanners for all  $\ell_p$  norms, and  
9        show that they can be constructed using a simple local search procedure. We then  
10       show the applications of our result to other tasks and in particular the problem of  
11       finding coresets for the Minimum Volume Enclosing Ellipsoid (MVEE) problem.

## 12    1 Introduction

13    In many applications in machine learning and signal processing, it is important to find the right  
14    “representation” for a collection of data points or signals. As one classic example, in the column  
15    subset selection problem (used in applications like feature selection, [Boutsidis et al., 2008]), the goal  
16    is to find a small subset of a given set of vectors that can represent all the other vectors via linear  
17    combinations. In the *sparse coding* or problem, the goal is to find a basis or dictionary under which a  
18    collection of vectors admit a sparse representation (see [Olshausen and Field, 1997]).

19    In this paper, we focus on finding “bases” that allow us to represent a given set of vectors using  
20    *small* coefficients. A now-classic example is the notion of an Auerbach basis. Auerbach used an  
21    extremal argument to prove that for any compact subset  $X$  of  $\mathbb{R}^d$ , there exists a basis of size  $d$  (that is  
22    a subset of  $X$ ) such that every  $v \in X$  can be expressed as a linear combination of the basis vectors  
23    using coefficients of magnitude  $\leq 1$  (see, e.g., [Lindenstrauss and Tzafriri, 2013]). This notion was  
24    rediscovered in the ML community in the well-known work of Awerbuch and Kleinberg [2008],  
25    and subsequently in papers that used such a basis as directions of exploration in bandit algorithms.  
26    The term *barycentric spanner* has been used to refer to Auerbach bases. More recently, the paper  
27    of Hazan et al. [2013] introduced an  $\ell_2$  version of barycentric spanners, which they called *volumetric*  
28    *spanners*, and use them to obtain improved bandit algorithms.

29    The same notion has been used in the literature on matrix sketching and low rank approximation,  
30    where it has been referred to as a “well-conditioned basis” (or a *spanning subset*); see Dasgupta et al.  
31    [2009]. These works use well conditioned bases to ensure that every small norm vector (in some  
32    normed space) can be expressed as a combination of the vectors in the basis using small coefficients.  
33    Woodruff and Yasuda [2023] used the results of [Todd, 2016] and [Kumar and Yildirim, 2005] on  
34    minimum volume enclosing ellipsoids (MVEE) to show the existence of well conditioned spanning  
35    subset of size  $O(d \log \log d)$ . (Note that this bound was already superseded by the work of Hazan  
36    et al. [2013], who used different techniques.)

Our main contribution in this paper is showing that a simple local search algorithm yields volumetric spanners with parameters that improve both lines of prior work Hazan et al. [2013] and Woodruff and Yasuda [2023]. Our arguments also allow us to study the case of having a general  $\ell_p$  norm bound on the coefficients. Thus, we obtain a common generalization with the results of Awerbuch and Kleinberg [2008] on barycentric spanners (which correspond to the case  $p = \infty$ ). Woodruff and Yasuda [2023] also showed a range of low-rank approximation problems (in offline and online regimes) for which well-conditioned spanning subsets are useful, and our result can be plugged in to obtain improvements in these settings.

One application we highlight is the following. Volumetric spanners turn out to be closely related to another well-studied problem, that of finding the minimum volume enclosing ellipsoid (MVEE) for a given set of points, or more generally, for a given convex body  $K$ . This is a classic problem in geometry [Welzl, 1991, Khachiyan and Todd, 1990]. The celebrated result of Fitz John (e.g., see [Ball, 1992]) characterized the optimal solution for general  $K$ . Computationally, the MVEE can be computed using a semidefinite programming relaxation [Boyd et al., 2004], and more efficient algorithms have subsequently been developed; see [Cohen et al., 2019]. Coresets for MVEE (defined formally below) were used to construct well-conditioned spanning subsets in the recent work of Woodruff and Yasuda [2023]. We give a result in the opposite direction, and show that the local search algorithm for finding well-conditioned spanning sets can be used to obtain a coreset of size  $O(d/\epsilon)$ . This quantitatively improves upon prior work, as we now discuss.

We now present our results in detail.

## 1.1 Our Results

We start with some notation. Suppose  $X = \{v_1, v_2, \dots, v_n\}$  is a set of vectors in  $\mathbb{R}^d$ . We say that a subset  $S \subseteq [n]$  is a *volumetric spanner* [Hazan et al., 2013] or a *well-conditioned spanning subset* [Woodruff and Yasuda, 2023], if for all  $j \in [n]$ , we can write  $v_j = \sum_{i \in S} \alpha_i v_i$ , with  $\|\alpha\|_2 \leq 1$ . More generally, we will consider the setting in which we are given parameters  $c, p$ , and we look to satisfy the condition  $\|\alpha\|_p \leq c$  (refer to Section 2) for a formal definition.

Our main results here are the following.

**Volumetric spanners via local search.** For the  $\ell_2$  case, we show that there exists a volumetric spanner as above with  $|S| \leq 3d$ . Moreover, it can be found via a single-swap local search procedure (akin to ones studied in the context of determinant maximization Madan et al. [2019]). This improves on the constructions of Hazan et al. [2013], Woodruff and Yasuda [2023] in terms of the size of  $S$  obtained. Our result is also simpler, without relying on spectral sparsification or coresets for minimum volume ellipsoids.

**General  $p$  norms.** For the case of general  $\ell_p$  norms, we show that a local search algorithm can still be used to find the near-optimal sized volumetric spanners. However, the optimal size exhibits three distinct behaviors:

- For  $p = 1$ , we show that there exist sets  $X$  of size  $n = \exp(d)$  for which any  $\ell_1$  volumetric spanner of strictly smaller than  $n$  can only achieve  $\|\alpha\|_1 = \tilde{\Omega}(\sqrt{n})$ .
- For  $p \in (1, 2)$ , we show that  $\ell_p$  volumetric spanners that can achieve  $\|\alpha\|_p \leq 1$  exist, but require  $|S| = \Omega\left(d^{\frac{p}{2p-2}}\right)$ . For strictly smaller sized  $S$ , we show a lower bound akin to the one above for  $p = 1$ .
- For  $p > 2$ , an  $\ell_p$  volumetric spanner (achieving  $\|\alpha\|_p \leq 1$ ) of size  $3d$  exists trivially because of the corresponding result for  $p = 2$ .

Our results show that one-swap local search yields near-optimal sized volumetric spanners for all  $\ell_p$  norms.

**Coresets for MVEE.** While well-conditioned spanning subsets have several applications [Woodruff and Yasuda, 2023], we highlight one in particular as it is a classic problem. Given a symmetric convex body  $K$ , the minimum volume enclosing ellipsoid (MVEE) of  $K$ , denoted  $\text{MVEE}(K)$ , is defined as the ellipsoid  $\mathcal{E}$  that satisfies  $\mathcal{E} \supset K$ , while minimizing  $\text{vol}(\mathcal{E})$ . We show that for any  $K$ , there exists a subset  $S$  of  $O\left(\frac{n}{\epsilon}\right)$  points of  $K$ , such that

$$\text{vol}(\text{MVEE}(K)) \leq (1 + \epsilon)^d \cdot \text{vol}(\text{MVEE}(S)).$$

We define such a set  $S$  to be a coreset, and while it is weaker than notions of coresets considered for other problems (see the discussion in Section 2.1), it is the one used in the earlier works of Todd [2016], Kumar and Yildirim [2005]. We thus improve the size of the best known coreset constructions for this fundamental problem, indeed, by showing that a simple local search yields the desired coreset.

**Other applications.** Our result can be used as a black-box to improve other results in the recent work of Woodruff and Yasuda [2023], such as entrywise Huber low rank approximation, average top  $k$  subspace embeddings and cascaded norm subspace embeddings and oblivious  $\ell_p$  subspace embeddings. In particular, we show that the local search algorithm provides a simple existential proof of oblivious  $\ell_p$  subspace embeddings for all  $p > 1$ . In this application, the goal is to find a small size “spanning subset” of a whole subspace of points (i.e., given a matrix  $A$ , the subspace is  $\{x \mid \|Ax\|_p = 1\}$ ), rather than a finite set. Our results for oblivious  $\ell_p$  subspace embedding improves the bounds of non-constructive solution of Woodruff and Yasuda [2023] by shaving a factor of  $\log \log d$  in size.

## 1.2 Related work

In the context of dealing with large data sets, getting simple algorithms based on greedy or local search strategies has been a prominent research direction. A large number of works have been on focusing to prove theoretical guarantees for these simple algorithms (e.g. [Madan et al., 2019, Altschuler et al., 2016, Mahabadi et al., 2019, Civril and Magdon-Ismail, 2009, Mirzasoleiman et al., 2013, Anari and Vuong, 2022]). Our techniques are inspired by these works, and contribute to this literature.

More broadly, with the increasing amounts of available data, there has been a significant amount of work on data summarization, where the goal is to find a small size set of representatives for a data set. Examples include column subset selection [Boutsidis et al., 2009, Deshpande and Vempala, 2006], subspace approximation [Achlioptas and McSherry, 2007], projective clustering [Deshpande et al., 2006, Agarwal and Mustafa, 2004], determinant maximization [Civril and Magdon-Ismail, 2009, Gritzmann et al., 1995, Nikolov, 2015], experimental design problems [Pukelsheim, 2006], sparsifiers [Batson et al., 2009], and coresets [Agarwal et al., 2005], which all have been extensively studied in the literature. Our results on coresets for MVEE are closely related to a line of work on *contact points* of the John Ellipsoid (these are the points at which an MVEE for a convex body touches the body). Srivastava [2012], improving upon a work of Rudelson [1997], showed that any convex  $K$  in  $\mathbb{R}^d$  can be well-approximated by another body  $K'$  that has at most  $O\left(\frac{d}{\epsilon^2}\right)$  contact points with its corresponding MVEE (and is thus “simpler”). While this result implies a coreset for  $K$ , it has a worse dependence on  $\epsilon$  than our results.

## 2 Preliminaries and Notation

**Definition 2.1** ( $\ell_p$ -volumetric spanner). *Given a set of  $n \geq d$  vectors  $\{v_i\}_{i \in [n]} \subset \mathbb{R}^d$  and  $p \geq 1$ , a subset of vectors indexed by  $S \subset [n]$  is an  $c$ -approximate  $\ell_p$ -volumetric spanner of size  $|S|$  if for every  $j \in [n]$ ,  $v_j$  can be written as  $v_j = \sum_{i \in S} \alpha_i v_i$  where  $\|\alpha\|_p \leq c$ .*

*In particular, when  $c = 1$  the set is denoted as an  $\ell_p$ -volumetric spanner of  $\{v_1, \dots, v_n\}$ .*

**Determinant and volume.** For a set of vectors  $\{v_1, v_2, \dots, v_d\} \in \mathbb{R}^d$ ,  $\det\left(\sum_{i=1}^d v_i v_i^T\right)$  is equal to the square of the volume of the parallelepiped formed by the vectors  $v_1, v_2, \dots, v_d$  with the origin.

The **determinant maximization problem** is defined as follows. Given  $n$  vectors  $v_1, v_2, \dots, v_n \in \mathbb{R}^d$ , and a parameter  $k$ , the goal is to find  $S \subseteq [n]$  with  $|S| = k$ , so as to maximize  $\det\left(\sum_{i \in S} v_i v_i^T\right)$ . In this paper, we will consider the case when  $k \geq d$ .

**Fact 2.2** (Cauchy-Binet formula). *Let  $v_1, \dots, v_n \in \mathbb{R}^d$ , with  $n \geq d$ . Then*

$$\det\left(\sum_{i=1}^n v_i v_i^T\right) = \sum_{S \subset [n], |S|=d} \det\left(\sum_{i \in S} v_i v_i^T\right)$$

**Lemma 2.3** (Matrix Determinant Lemma). *Suppose  $A$  is an invertible square matrix and  $u, v$  are column vectors, then*

$$\det(A + uv^T) = (1 + v^T A^{-1} u) \det(A).$$

133 **Lemma 2.4** (Sherman-Morrison formula). Suppose  $A$  is an invertible square matrix and  $u, v$  are  
 134 column vectors. Then,  $A + uv^\top$  is invertible iff  $1 + v^\top A^{-1}u \neq 0$ . In this case,

$$(A + uv^\top)^{-1} = A^{-1} - \frac{A^{-1}uv^\top A^{-1}}{1 + v^\top A^{-1}u}$$

135 We will also use the following inequality, which follows from the classic Hölder’s inequality.

136 **Lemma 2.5.** For any  $1 \leq p \leq q$  and  $x \in \mathbb{R}^n$ ,  $\|x\|_p \leq n^{1/p-1/q} \|x\|_q$ .

## 137 2.1 Coresets for MVEE

138 As discussed earlier, for a set of points  $X \subset \mathbb{R}^d$ , we denote by  $\text{MVEE}(X)$  the minimum volume  
 139 enclosing ellipsoid (MVEE) of  $X$ . We say that  $S$  is a coreset for MVEE on  $X$  if

$$\text{vol}(\text{MVEE}(X)) \leq (1 + \epsilon)^d \cdot \text{vol}(\text{MVEE}(S)).$$

140 **Strong vs. weak coresets.** The notion above agrees with prior work, but it might be more natural (in  
 141 the spirit of *strong* coresets considered for problems such as clustering; see, e.g., Cohen-Addad et al.  
 142 [2021]) to define a coreset as a set  $S$  such that for any  $\mathcal{E} \supset S$ ,  $(1 + \epsilon)\mathcal{E} \supset X$ . Indeed, this guarantee  
 143 need not hold for the coresets we (and prior work) produce. An example is shown in Figure 1.

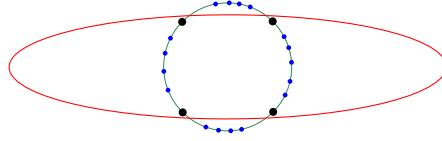

Figure 1: Suppose  $X$  is the set of all points (blue and black), and let  $S$  be the set of black points. While  $\text{MVEE}(X) = \text{MVEE}(S)$ , there can be ellipsoids like the one in red, that contain  $S$  but not  $X$  even after scaling up by a small constant.

## 144 3 Local Search Algorithm for Volumetric Spanners

145 We will begin by describing simple local search procedures LocalSearch-R and LocalSearch-NR.  
 146 The former allows “repeating” vectors (i.e., choosing vectors that are already in the chosen set), while  
 147 the latter does not.

148 LocalSearch-NR will be used for constructing well-conditioned bases, and LocalSearch-R will be  
 149 used to construct coresets for the minimum volume enclosing ellipsoid problem.

---

### Algorithm 1 Procedure LocalSearch-NR

---

- 1: **Input:** Set of vectors  $\{v_1, v_2, \dots, v_n\} \subseteq \mathbb{R}^d$ , parameter  $\delta > 0$ , integer  $r \geq d$
  - 2: **Output:** Set of indices  $S$
  - 3: Initialize  $S$  using the greedy procedure described in the text
  - 4: Define  $M = \sum_{i \in S} v_i v_i^T$
  - 5: **while**  $\exists i \in S$  and  $j \in [n] \setminus S$  such that  $\det(M - v_i v_i^T + v_j v_j^T) > (1 + \delta) \det(M)$  **do**
  - 6:   Set  $S \leftarrow S \setminus \{i\} \cup \{j\}$
  - 7:    $M \leftarrow M - v_i v_i^T + v_j v_j^T$
  - 8: **Return**  $S$
- 

150 **Initialization.** The set  $S$  is initialized as the output of the standard greedy algorithm for volume  
 151 maximization [Civril and Magdon-Ismail, 2009] running for  $d$  iterations, and then augmented with a  
 152 set of  $(r - d)$  arbitrary vectors from  $\{v_1, \dots, v_n\}$ .

153 **Procedure LocalSearch-R.** The procedure LocalSearch-R (where we allow repetitions) is almost  
 154 identical to Algorithm 1. It uses the same initialization, however, the set  $S$  that is maintained is now  
 155 a multiset. More importantly, when finding  $j$  in the local search step, LocalSearch-R looks over all  
 156  $j \in [n]$  (including potentially  $j \in S$ ). Also in this case, removing  $i$  from  $S$  in Line 6 corresponds to  
 157 removing “one copy” of  $i$ .

### 3.1 Running time of Local Search

We will assume throughout that the dimension of  $\text{span}(\{v_1, v_2, \dots, v_n\})$  is  $d$  (i.e., the given vectors span all of  $\mathbb{R}^d$ ; this is without loss of generality, as we can otherwise restrict to the span).

The following lemma bounds the running time of local search in terms of the parameters  $r, \delta$ . We note that we only focus on bounding the *number of iterations* of local search. Each iteration involves potentially computing  $nr$  determinants, and assuming the updates are done via the matrix determinant lemma and the Sherman-Morrison formula, the total time is roughly  $O(nrd^2)$ . This can be large for large  $n, r$ , and it is one of the well-known drawbacks of local search.

**Lemma 3.1.** *The number of iterations of the while loop in the procedures LocalSearch-R and LocalSearch-NR is bounded by*

$$O\left(\frac{d}{\delta} \cdot \log r\right).$$

The proof uses the approximation guarantee of Civril and Magdon-Ismael [2009] on the initialization, and is similar to analyses in prior work Kumar and Yildirim [2005]. We defer the details to Section B in the supplement.

### 3.2 Analysis of Local Search

We now prove some simple properties of the Local Search procedures. Following the notation of Madan et al. [2019], we define the following. Given a choice of  $S$  in the algorithm (which defines the corresponding matrix  $M$ ), let

$$\tau_i := v_i^T M^{-1} v_i, \quad \tau_{ij} := v_i^T M^{-1} v_j. \quad (1)$$

Note that  $\tau_i$  is often referred to as the leverage score. We have the following (proof in Section B).

**Lemma 3.2.** *Let  $v_1, \dots, v_n \in \mathbb{R}^d$  and let  $S$  be a (multi-)set of indices in  $[n]$ . Define  $M = \sum_{i \in S} v_i v_i^T$ , and suppose  $M$  has full rank. Then,*

- $\sum_{i \in S} \tau_i = d$ ,
- For any  $i, j \in [n]$ ,  $\tau_{ij} = \tau_{ji}$ .

The following key lemma lets us analyze how the determinant changes when we perform a swap.

**Lemma 3.3.** *Let  $S$  be a (multi-)set of indices and let  $M = \sum_{i \in S} v_i v_i^T$  be full-rank. Let  $i, j$  be any two indices. We have*

$$\det(M - v_i v_i^T + v_j v_j^T) = \det(M) [(1 - \tau_i)(1 + \tau_j) + \tau_{ij}^2].$$

*Remark.* Note that the proof will not use any additional properties about  $i, j$ . They could be equal to each other, and  $i, j$  may or may not already be in  $S$ .

*Proof.* By the matrix determinant lemma (Lemma 2.3),

$$\begin{aligned} \det(M + v_j v_j^T - v_i v_i^T) &= \det(M + v_j v_j^T) (1 - v_i^T (M + v_j v_j^T)^{-1} v_i) \\ &= \det(M) (1 + v_j^T M^{-1} v_j) (1 - v_i^T (M + v_j v_j^T)^{-1} v_i). \end{aligned} \quad (2)$$

Next, we apply Sherman-Morrison formula (Lemma 2.4) to get

$$\begin{aligned} 1 - v_i^T (M + v_j v_j^T)^{-1} v_i &= 1 - v_i^T \left( M^{-1} - \frac{M^{-1} v_j v_j^T M^{-1}}{1 + v_j^T M^{-1} v_j} \right) v_i \\ &= 1 - \tau_i + \frac{\tau_{ij}^2}{1 + \tau_j}. \end{aligned} \quad (3)$$

Combining the above two expressions, we get

$$\det(M + v_j v_j^T - v_i v_i^T) = \det(M) (1 + \tau_j) \left[ 1 - \tau_i + \frac{\tau_{ij}^2}{1 + \tau_j} \right].$$

Simplifying this yields the lemma.  $\square$

189 The following lemma shows the structural property we have when the local search procedure ends.  
 190 **Lemma 3.4.** *Let  $S$  be a (multi-)set of indices and  $M = \sum_{i \in S} v_i v_i^T$  as before. Let  $j \in [n]$ , and  
 191 suppose that for all  $i \in S$ ,  $\det(M - v_i v_i^T + v_j v_j^T) < (1 + \delta) \det(M)$ . Then we have*

$$\tau_j < \frac{d + r\delta}{r - d + 1}.$$

192 Once again, the lemma does not assume anything about  $j$  being in  $S$ .

193 *Proof.* First, observe that for any  $j \in [n]$ , we have

$$\sum_{i \in S} \tau_{ij}^2 = \sum_{i \in S} v_j^T M^{-1} v_i v_i^T M^{-1} v_j = v_j^T M^{-1} M M^{-1} v_j = \tau_j.$$

194 Combining this observation with Lemma 3.3 and summing over  $i \in S$  (with repetitions, if  $S$  is a  
 195 multi-set), we have

$$(1 + \tau_j)(r - \sum_{i \in S} \tau_i) + \tau_j < r(1 + \delta).$$

196 Now using Lemma 3.2, we get

$$(1 + \tau_j)(r - d) + \tau_j < r + r\delta,$$

197 and simplifying this completes the proof of the lemma.  $\square$

198 Since Lemma 3.4 does not make any additional assumptions about  $j$ , we immediately have:

199 **Corollary 3.5.** *The following properties hold for the output of the Local search procedures.*

- 200 1. For *LocalSearch-NR*, the output  $S$  satisfies: for all  $j \in [n] \setminus S$ ,  $\tau_j < \frac{d+r\delta}{r-d+1}$ .  
 201 2. For *LocalSearch-R*, the output  $S$  satisfies: for all  $j \in [n]$ ,  $\tau_j < \frac{d+r\delta}{r-d+1}$ .

### 202 3.3 Volumetric Spanners: Spanning Subsets in the $\ell_2$ Norm

203 We use Lemma 3.1 and Corollary 3.5 to obtain the following.

204 **Theorem 3.6** ( $\ell_2$ -volumetric spanner). *For any set  $X = \{v_1, v_2, \dots, v_n\}$  of  $n \geq d$  vectors in  $\mathbb{R}^d$   
 205 and parameter  $r \geq d$ , *LocalSearch-NR* outputs a  $(\max\{1, (\frac{d+r\delta}{r-d+1})^{1/2}\})$ -approximate  $\ell_2$ -volumetric  
 206 spanner of  $X$  of size  $r$  in  $O(\frac{d}{\delta} \log r)$  iterations of Local Search.*

207 *In particular, setting  $r = 3d$  and  $\delta = 1/3$ , *LocalSearch-NR* returns an  $\ell_2$ -volumetric spanner of size  
 208  $3d$  in  $O(d \log d)$  iterations of Local Search.*

209 *Proof.* Let  $S$  be the output of *LocalSearch-NR* with the parameters  $r, \delta$  on  $X$ . Let  $U$  be the matrix  
 210 whose columns are  $\{v_i : i \in S\}$ . We show how to express any  $v_j \in X$  as  $U\alpha$ , where  $\alpha \in \mathbb{R}^r$  is a  
 211 coefficient vector with  $\|\alpha\|_2$  being small.

212 For any  $j \in S$ ,  $v_j$  can be clearly written with  $\alpha$  being a vector that is 1 in the row corresponding to  $v_j$   
 213 and 0 otherwise, thus  $\|\alpha\| = 1$ . For any  $j \notin S$ , by definition, the solution to  $U\alpha = v_j$  is  $\alpha = U^\dagger v_j$ ,  
 214 where  $U^\dagger$  is the Moore-Penrose pseudoinverse. Thus, we have

$$\|\alpha\|_2^2 = v_j^T (U^\dagger)^T U^\dagger v_j = v_j^T (U U^T)^{-1} v_j = \tau_j.$$

215 Here we are using standard properties of the pseudoinverse. (These can be proved easily using the  
 216 SVD). Hence, by Corollary 3.5, we have  $\|\alpha\|_2 \leq (\frac{d+r\delta}{r-d+1})^{1/2}$ .  $\square$

### 217 3.4 Spanning Subsets in the $\ell_p$ Norm

218 We now extend our methods above for all  $\ell_p$ -norms, for  $p \in [1, \infty)$ . As outlined in Section 1.1, we  
 219 see three distinct behaviors. We begin now with the lower bound for  $p = 1$ .

220  **$\ell_1$ -volumetric spanner.** For the case  $p = 1$ , we show that small sized spanning subsets do not exist  
 221 for non-trivial approximation factors.

222 Our construction is based on “almost orthogonal” sets of vectors.

223 **Lemma 3.7.** *There exists a set of  $m = \exp(\Omega(d))$  unit vectors  $v_1, \dots, v_m \in \mathbb{R}^d$  such that for every  
 224 pair of  $i, j \in [m]$ ,  $|\langle v_i, v_j \rangle| \leq c\sqrt{\frac{\log m}{d}}$  for some fixed constant  $c$ .*

225 An example construction of almost orthogonal vectors is a collection of random vectors where each  
 226 coordinate of each vector is picked uniformly at random from  $\{\frac{1}{\sqrt{d}}, \frac{-1}{\sqrt{d}}\}$  (e.g., see [Dasgupta et al.,  
 227 2009]).

228 **Theorem 3.8** (Lower bound for  $\ell_1$ -volumetric spanners). *For any  $n \leq \exp(\Omega(d))$ , there exists a set  
 229 of  $n$  vectors in  $\mathbb{R}^d$  that has no  $o(\sqrt{\frac{d}{\log n}})$ -approximate  $\ell_1$ -volumetric spanner of size at most  $n - 1$ .*

230 In other words, unless the spanning subset contains all vectors, it is not possible to get an  $\ell_1$ -volumetric  
 231 spanner with approximation factor  $o(\sqrt{\frac{d}{\log n}})$ .

232 *Proof.* Let  $X = \{v_1, \dots, v_n\}$  be a set of  $n$  almost orthonormal vectors as in Lemma 3.7. Suppose  
 233 for the sake of contradiction, that there exists a spanning subset indexed by  $S$  that is a strict subset of  
 234  $[n]$ . Note that for every  $i \in [n] \setminus S$  and  $j \in S$ ,  $|\langle v_i, v_j \rangle| \leq c\sqrt{\frac{\log n}{d}}$ . So, for any representation of  $v_i$   
 235 in terms of vectors in  $S$ , i.e.,  $v_i = \sum_{j \in S} \alpha_j v_j$ ,

$$1 = \langle v_i, v_i \rangle = \sum_{j \in S} \alpha_j \langle v_i, v_j \rangle \leq \|\alpha\|_1 \cdot c\sqrt{\frac{\log n}{d}}.$$

236 Hence,  $\|\alpha\|_1 \geq \frac{1}{c}\sqrt{\frac{d}{\log n}}$ , as long as  $|S| < n$ . □

237 Note that the lower bound nearly matches the easy upper bound that one obtains from  $\ell_2$  volumetric  
 238 spanners (Theorem 3.6), described below:

239 **Corollary 3.9.** *For any set of vectors  $X = \{v_1, v_2, \dots, v_n\}$ , an  $\ell_2$ -volumetric spanner is also a  
 240  $2\sqrt{d}$ -approximate  $\ell_1$ -volumetric spanner. Consequently, such a spanner of size  $O(d)$  exists and can  
 241 be found in  $O(d \log d)$  iterations of Local Search.*

242 The proof follows from the fact that if  $\|\alpha\|_2 \leq 1$ ,  $\|\alpha\|_1 \leq \sqrt{3d}$ , for  $\alpha \in \mathbb{R}^{3d}$  (which is a consequence  
 243 of the Cauchy-Schwarz inequality). Note that the existence and construction of an  $\ell_2$  volumetric  
 244 spanner of size  $3d$  was shown in Theorem 3.6.

245  **$\ell_p$ -volumetric spanner for  $p \in (1, 2)$ .** Next, we apply the same argument as above for the case  
 246  $p \in (1, 2)$ . Here, we see that the lower bound is not so strong: one can obtain a trade-off between  
 247 the size of the spanner and the approximation. Once again, the solution returned by LocalSearch-NR  
 248 is an almost optimal construction for spanning subsets in the  $\ell_p$  norm. The proofs are deferred to  
 249 Section B of the Supplement.

250 **Theorem 3.10** (Lower bound for  $\ell_p$ -volumetric spanners for  $p \in (1, 2)$ ). *For any value of  $n \leq e^{\Omega(d)}$   
 251 and  $1 < p < 2$ , there exists a set of  $n$  vectors in  $\mathbb{R}^d$  that has no  $o(r^{\frac{1}{p}-1} \cdot (\frac{d}{\log n})^{\frac{1}{2}})$ -approximate  
 252  $\ell_p$ -volumetric spanner of size at most  $r$ .*

253 *In particular, a (1-approximate)  $\ell_p$ -volumetric spanner of  $V$ , has size  $\Omega((\frac{d}{\log n})^{\frac{p}{2p-2}})$ .*

254 Next, we show that local search outputs almost optimal  $\ell_p$ -volumetric spanners.

255 **Theorem 3.11** (Construction of  $\ell_p$ -volumetric spanners for  $p \in (1, 2)$ ). *For any set of vectors  
 256  $X = \{v_1, v_2, \dots, v_n\} \subset \mathbb{R}^d$  and  $p \in (1, 2)$ , LocalSearch-NR outputs an  $O(r^{\frac{1}{p}-1} \cdot d^{\frac{1}{2}})$ -approximate  
 257  $\ell_p$ -volumetric spanner of  $X$  of size  $r$ .*

258 *In particular, the local search algorithm outputs a 1-approximate  $\ell_p$ -volumetric spanner when  
 259  $r = O(d^{\frac{p}{2p-2}})$ .*

260  $\ell_p$ -volumetric spanner for  $p > 2$ . The result for  $p > 2$  simply follows from the results for  $\ell_2$ -norm  
 261 and the fact that  $\|x\|_p \leq \|x\|_2$  for any  $p \geq 2$  when  $\|x\|_2 \leq 1$ .

262 **Corollary 3.12** ( $\ell_p$ -volumetric spanner for  $p > 2$ ). *For any set of  $n$  vectors  $X = \{v_1, v_2, \dots, v_n\} \subset$   
 263  $\mathbb{R}^d$ , `LocalSearch-NR` outputs a 1-approximate  $\ell_p$ -volumetric spanner of  $X$  of size  $r = 3d$  in  
 264  $O(\frac{d}{\delta} \log d)$  iterations of `Local Search`.*

## 265 4 Applications of Local Search and Volumetric Spanners

266 We now give an application of our Local Search algorithms and volumetric spanners to the problem  
 267 of finding coresets for the MVEE problem. For other applications, please see Section A.

268 **Definition 4.1** (Minimum volume enclosing ellipsoid (MVEE)). *Given a set of points  $X =$   
 269  $\{v_1, v_2, \dots, v_n\} \subseteq \mathbb{R}^d$ , define  $\mathcal{E}(X)$  to be the ellipsoid of the minimum volume containing the  
 270 points  $X \cup (-X)$ , where  $(-X) := \{-v : v \in X\}$ .*

271 While the MVEE problem is well-defined for general sets of points, we are restricting to sets that are  
 272 symmetric about the origin. It is well-known (see Todd [2016]) that the general case can be reduced  
 273 to the symmetric one. Thus for any  $X$ ,  $\mathcal{E}(X)$  is centered at the origin. Since  $\mathcal{E}$  is convex, one can  
 274 also define  $\mathcal{E}(X)$  to be the ellipsoid of the least volume containing  $\text{conv}(\pm v_1, \pm v_2, \dots, \pm v_n)$ , where  
 275  $\text{conv}(\cdot)$  refers to the convex hull.

276 As defined in Section 2.1, a coreset is a subset of  $X$  that preserves the volume of the MVEE.

277 **Theorem 4.2.** *Consider a set of vectors  $X = \{v_1, \dots, v_n\} \subset \mathbb{R}^d$ . Let  $S$  be the output of the  
 278 algorithm `LocalSearch-R` on  $X$ , with*

$$r = \left(1 + \frac{4}{\epsilon}\right)d, \quad \delta = \frac{\epsilon d}{4r}. \quad (4)$$

279 *Then  $S$  is a coreset for the MVEE problem on  $X$ .*

280 To formulate the MVEE problem, recall that any ellipsoid  $\mathcal{E}$  can be defined using a positive semidefi-  
 281 nite (PSD) matrix  $H$ , as

$$\mathcal{E} = \{x : x^T H x \leq d\},$$

282 and for  $\mathcal{E}$  defined as such, we have  $\text{vol}(\mathcal{E}) = \det(H^{-1})$ , up to a factor that only depends on the  
 283 dimension  $d$  (i.e., is independent of the choice of the ellipsoid). Thus, to find  $\mathcal{E}$ , we can consider the  
 284 following optimization problem.

$$\begin{aligned} (\text{MVEE}) : \min \quad & -\ln \det(H) \quad \text{subject to} \\ & v_i^T H v_i \leq d \quad \forall i \in [n], \\ & H \succeq 0. \end{aligned}$$

285 It is well known (e.g., Boyd et al. [2004]) that this is a convex optimization problem. For any  $\lambda \in \mathbb{R}^n$   
 286 with  $\lambda_i \geq 0$  for all  $i \in [n]$ , the Lagrangian for this problem can be defined as:

$$\mathcal{L}(H; \lambda) = -\ln \det(H) + \sum_{i \in [n]} \lambda_i (v_i^T H v_i - d).$$

287 Let  $\text{OPT}$  be the optimal value of the problem MVEE defined above. For any  $\lambda$  with non-negative  
 288 coordinates, we have

$$\text{OPT} \geq \min_H \mathcal{L}(H; \lambda),$$

289 where the minimization is over the feasible set for MVEE; this is because over the feasible set, the  
 290 second term the definition of  $\mathcal{L}(H; \lambda)$  is  $\leq 0$ . We can then remove the feasibility constraint, and  
 291 conclude that

$$\text{OPT} \geq \min_{H \succeq 0} \mathcal{L}(H; \lambda),$$

as this only makes the minimum smaller. For any given  $\lambda$  with non-negative coordinates, the minimizing  $H$  can now be found by setting the derivative to 0,

$$-H^{-1} + \sum_{i \in [n]} u_i v_i v_i^T = 0 \iff H = \left( \sum_i \lambda_i v_i v_i^T \right)^{-1}.$$

There is a mild technicality here: if  $\lambda$  is chosen such that  $\sum_i \lambda_i v_i v_i^T$  is not invertible, then  $\min_{H \succeq 0} (H; \lambda) = -\infty$ . We will only consider  $u$  for which this is not the case.

Thus, we have that for any  $\lambda$  with non-negative coordinates for which  $\sum_i \lambda_i v_i v_i^T$  is invertible,

$$\text{OPT} \geq \ln \det \left( \sum_i \lambda_i v_i v_i^T \right) + d - d \sum_i u_i. \quad (5)$$

We are now ready to prove Theorem 4.2 on small-sized coresets.

*Proof.* Let  $X = \{v_1, v_2, \dots, v_n\}$  be the set of given points, and let  $S$  be the output of the algorithm LocalSearch-R on  $X$ , with  $r, \delta$  chosen later in (4). By definition,  $S$  is a multi-set, and we define  $T$  to be its support,  $\text{supp}(S)$ . We prove that  $T$  is a coreset for the MVEE problem on  $X$ .

To do so, define  $\text{OPT}_X$  and  $\text{OPT}_T$  to be the optimum values of the optimization problem MVEE defined earlier on sets  $X$  and  $T$  respectively. Since the problem on  $T$  has fewer constraints, we have  $\text{OPT}_T \leq \text{OPT}_X$ , and thus we focus on showing that  $\text{OPT}_X \leq (1 + \epsilon)d + \text{OPT}_T$ . This will imply the desired bound on the volumes.

Let  $S$  be the multi-set returned by the algorithm LocalSearch-R, and let  $M := \sum_{i \in S} v_i v_i^T$ . Define  $\lambda_i = n_i/r$ , where  $n_i$  is the number of times  $i$  appears in  $S$ . By definition, we have that  $\sum_{i \in [n]} \lambda_i = 1$ . Further, if we define  $H := (\sum_{i \in [n]} \lambda_i v_i v_i^T)^{-1}$ , we have  $H^{-1} = \frac{1}{r} \cdot M$ .

Now, using Corollary 3.5, we have that for all  $j \in [n]$ ,

$$v_j^T M^{-1} v_j < \frac{d + r\delta}{r - d + 1} \implies v_j^T H v_j < \frac{r(d + r\delta)}{r - d + 1} = d \left( 1 + \frac{d - 1}{r - d + 1} \right) \left( 1 + \frac{r\delta}{d} \right).$$

Our choice of parameters will be such that both the terms in the parentheses are  $(1 + \epsilon/4)$ . For this, we can choose  $r, \delta$  as in (4).

Thus, we have that  $H' = \frac{H}{(1 + \epsilon)}$  is a feasible solution to the optimization problem MVEE on  $X$ . This gives us that  $\text{OPT}_X \leq (1 + \epsilon)d - \ln \det(H)$ .

Next, using the fact that the  $u_i$  are supported on  $T = \text{supp}(S)$ , we can use (5) to conclude that  $\text{OPT}_T \geq \ln \det(H^{-1}) = -\ln \det(H)$ , where we also used the fact that  $\sum_i \lambda_i = 1$ .

Together, these imply that  $\text{OPT}_X \leq (1 + \epsilon)d + \text{OPT}_T$ , as desired.  $\square$

## 5 Conclusion

We show that a one-swap local search procedure can be used to obtain an efficient construction of volumetric spanners, also known as well-conditioned spanning subsets. This improves (and simplifies) two lines of work that have used this notion in applications ranging from bandit algorithms to matrix sketching and low rank approximation. We then show that the local search algorithm also yields nearly tight results for an  $\ell_p$  analog of volumetric spanners. Finally, we obtain  $O(d/\epsilon)$  sized coresets for the classic problem of minimum volume enclosing ellipsoid, improving previous results by a  $d \log \log d$  term.

## References

- D. Achlioptas and F. McSherry. Fast computation of low-rank matrix approximations. *Journal of the ACM (JACM)*, 54(2):9-es, 2007.

327 P. K. Agarwal and N. H. Mustafa.  $k$ -means projective clustering. In *Proceedings of the twenty-third*  
328 *ACM SIGMOD-SIGACT-SIGART symposium on Principles of database systems*, pages 155–165,  
329 2004.

330 P. K. Agarwal, S. Har-Peled, K. R. Varadarajan, et al. Geometric approximation via coresets.  
331 *Combinatorial and computational geometry*, 52(1):1–30, 2005.

332 J. Altschuler, A. Bhaskara, G. Fu, V. Mirrokni, A. Rostamizadeh, and M. Zadimoghaddam. Greedy  
333 column subset selection: New bounds and distributed algorithms. In *International conference on*  
334 *machine learning*, pages 2539–2548. PMLR, 2016.

335 N. Anari and T.-D. Vuong. From sampling to optimization on discrete domains with applications to  
336 determinant maximization. In *Conference on Learning Theory*, pages 5596–5618. PMLR, 2022.

337 B. Awerbuch and R. Kleinberg. Online linear optimization and adaptive routing. *Journal of Computer*  
338 *and System Sciences*, 74(1):97–114, 2008.

339 K. Ball. Ellipsoids of maximal volume in convex bodies. *Geometriae Dedicata*, 41(2):241–250,  
340 1992.

341 J. D. Batson, D. A. Spielman, and N. Srivastava. Twice-ramanujan sparsifiers. In *Proceedings of the*  
342 *forty-first annual ACM symposium on Theory of computing*, pages 255–262, 2009.

343 C. Boutsidis, M. W. Mahoney, and P. Drineas. Unsupervised feature selection for principal compo-  
344 nents analysis. In *Proceedings of the 14th ACM SIGKDD international conference on Knowledge*  
345 *discovery and data mining*, pages 61–69, 2008.

346 C. Boutsidis, M. W. Mahoney, and P. Drineas. An improved approximation algorithm for the column  
347 subset selection problem. In *Proceedings of the twentieth annual ACM-SIAM symposium on*  
348 *Discrete algorithms*, pages 968–977. SIAM, 2009.

349 S. Boyd, S. P. Boyd, and L. Vandenberghe. *Convex optimization*. Cambridge university press, 2004.

350 A. Civril and M. Magdon-Ismail. On selecting a maximum volume sub-matrix of a matrix and related  
351 problems. *Theoretical Computer Science*, 410(47-49):4801–4811, 2009.

352 M. B. Cohen, B. Cousins, Y. T. Lee, and X. Yang. A near-optimal algorithm for approximating the  
353 john ellipsoid. In *Conference on Learning Theory*, pages 849–873. PMLR, 2019.

354 V. Cohen-Addad, D. Saulpic, and C. Schwiegelshohn. A new coreset framework for clustering.  
355 In S. Khuller and V. V. Williams, editors, *53rd Annual ACM SIGACT Symposium on Theory of*  
356 *Computing (STOC)*, pages 169–182, 2021.

357 A. Dasgupta, P. Drineas, B. Harb, R. Kumar, and M. W. Mahoney. Sampling algorithms and coresets  
358 for  $\ell_p$  regression. *SIAM Journal on Computing*, 38(5):2060–2078, 2009.

359 A. Deshpande and S. Vempala. Adaptive sampling and fast low-rank matrix approximation. In  
360 *Proceedings of the 9th international conference on Approximation Algorithms for Combinatorial*  
361 *Optimization Problems, and 10th international conference on Randomization and Computation*,  
362 pages 292–303, 2006.

363 A. Deshpande, L. Rademacher, S. S. Vempala, and G. Wang. Matrix approximation and projective  
364 clustering via volume sampling. *Theory of Computing*, 2(1):225–247, 2006.

365 P. Gritzmann, V. Klee, and D. Larman. Largest  $j$ -simplices in  $n$ -polytopes. *Discrete & Computational*  
366 *Geometry*, 13:477–515, 1995.

367 E. Hazan, Z. S. Karnin, and R. Meka. Volumetric spanners and their applications to machine learning.  
368 *CoRR*, abs/1312.6214, 2013.

369 L. G. Khachiyan and M. J. Todd. On the complexity of approximating the maximal inscribed  
370 ellipsoid for a polytope. Technical report, Cornell University Operations Research and Industrial  
371 Engineering, 1990.

- 372 G. Kindler, A. Naor, and G. Schechtman. The UGC hardness threshold of the  $L_p$  grothendieck  
373 problem. *Mathematics of Operations Research*, 35(2):267–283, 2010.
- 374 P. Kumar and E. A. Yildirim. Minimum-volume enclosing ellipsoids and core sets. *Journal of*  
375 *Optimization Theory and applications*, 126(1):1–21, 2005.
- 376 J. Lindenstrauss and L. Tzafriri. *Classical Banach Spaces I: Sequence Spaces*. Ergebnisse der  
377 Mathematik und ihrer Grenzgebiete. 2. Folge. Springer Berlin Heidelberg, 2013.
- 378 V. Madan, M. Singh, U. Tantipongpipat, and W. Xie. Combinatorial algorithms for optimal design.  
379 In *Conference on Learning Theory*, pages 2210–2258. PMLR, 2019.
- 380 S. Mahabadi, P. Indyk, S. O. Gharan, and A. Rezaei. Composable core-sets for determinant maxi-  
381 mization: A simple near-optimal algorithm. In *International Conference on Machine Learning*,  
382 pages 4254–4263. PMLR, 2019.
- 383 B. Mirzasoleiman, A. Karbasi, R. Sarkar, and A. Krause. Distributed submodular maximization:  
384 Identifying representative elements in massive data. *Advances in Neural Information Processing*  
385 *Systems*, 26, 2013.
- 386 A. Nikolov. Randomized rounding for the largest simplex problem. In *Proceedings of the forty-seventh*  
387 *annual ACM symposium on Theory of computing*, pages 861–870, 2015.
- 388 B. A. Olshausen and D. J. Field. Sparse coding with an overcomplete basis set: A strategy employed  
389 by V1? *Vision Research*, 37(23):3311–3325, 1997. ISSN 0042-6989.
- 390 F. Pukelsheim. *Optimal design of experiments*. SIAM, 2006.
- 391 M. Rudelson. Contact points of convex bodies. *Israel Journal of Mathematics*, 101:93–124, 1997.
- 392 N. Srivastava. On contact points of convex bodies. In *Geometric Aspects of Functional Analysis:*  
393 *Israel Seminar 2006–2010*, pages 393–412. Springer, 2012.
- 394 M. J. Todd. *Minimum-volume ellipsoids: Theory and algorithms*. SIAM, 2016.
- 395 E. Welzl. Smallest enclosing disks (balls and ellipsoids). In *New Results and New Trends in Computer*  
396 *Science*, volume 555 of *Lecture Notes in Computer Science*, pages 359–370. Springer, 1991.
- 397 D. P. Woodruff and T. Yasuda. New subset selection algorithms for low rank approximation: Offline  
398 and online. *arXiv preprint arXiv:2304.09217*, 2023.

## A Other Applications of Volumetric Spanners

We now show some direct applications of our construction of volumetric spanners.

### A.1 Oblivious $\ell_p$ Subspace Embeddings

Oblivious subspace embeddings (OSEs) are a well studied tool in matrix approximation, where the goal is to show that there exist sketching matrices that preserve the norm (say the  $\ell_p$  norm) of all vectors in an unknown subspace with high probability. The constructions and analyses of OSEs rely on the existence of a well-conditioned spanning set for the vectors of interest. The following follows directly from Theorem 3.6 (note that we are only using our result for  $\ell_2$ ).

**Theorem A.1** (Improvement of Theorem 1.11 in [Woodruff and Yasuda, 2023]). *Let  $p \in (1, \infty)$  and let  $A \in \mathbb{R}^{n \times d}$ . There exists a matrix  $R \in \mathbb{R}^{d \times s}$  for  $s = 3d$  such that  $\|ARe_i\|_p = 1$  for every  $i \in [s]$ , and for every  $x \in \mathbb{R}^d$ ,  $\|Ax\|_p = 1$ , there exists a  $y \in \mathbb{R}^s$  such that  $Ax = ARy$  and  $\|y\|_2 \leq 1$ .*

The Theorem follows by considering the set

$$X = \{Ax : \|Ax\|_p = 1\},$$

and considering a well conditioned spanning subset in the  $\ell_2$  norm. Theorem 3.6 shows the existence of such a subset with  $s = 3d$ , thus the theorem follows.

However, note that the proof is non-constructive. In order to make it efficient, we need to show that the local search procedure can be implemented efficiently. For  $p \geq 2$ , this may be possible via the classic result of Kindler et al. [2010] on  $\ell_p$  variants of the Gröthendieck inequality, but we note that the applications in [Woodruff and Yasuda, 2023] require only the existential statement.

### A.2 Entrywise Huber Low Rank Approximation

The Huber loss is a classic method introduced as a robust analog to least squares error. There has been a lot of work on finding low rank approximations to a matrix where the goal is to minimize the entry-wise Huber loss. The following slightly improves upon the work of Woodruff and Yasuda [2023].

**Theorem A.2.** *Let  $A \in \mathbb{R}^{n \times d}$  and let  $k \geq 1$ . There exists a polynomial time algorithm that outputs a subset  $S \subset [d]$  of columns in  $A$  of size  $O(k \log d)$  and  $X \in \mathbb{R}^{S \times d}$  such that*

$$\|A - A|_S^S X\|_H \leq O(k) \min_{\text{rank}(A_k) \leq k} \|A - A_k\|_H,$$

where  $A|_S^S$  denotes the matrix whose columns are the columns of  $A$  indexed by  $S$  and  $\|\cdot\|_H$  denotes the entrywise Huber loss.

Note that the size of  $S$  is reduced from  $O(k \log \log k \log d)$  to  $O(k \log d)$ . The proof of Theorem A.2 follows from Theorem 1.6 in [Woodruff and Yasuda, 2023] and our improved construction for  $\ell_2$ -volumetric spanner, i.e.,  $O(1)$ -approximate spanning subset of size  $O(d)$  (see Theorem 3.6).

### A.3 Average Top $k$ Subspace Embedding

For a given vector  $v \in \mathbb{R}^n$ , the average top  $k$  loss is defined as

$$\|v\|_{\text{AT}_k} := \frac{1}{k} \sum_{i \in [k]} |v_{[i]}|,$$

where  $v_i$  denotes the  $i$ th largest coordinate in  $v$ .

Using the results of [Woodruff and Yasuda, 2023] relating the problem of average top  $k$  subspace embedding to  $\ell_2$ -volumetric spanners as a black-box, we have the following theorems for small  $k$  (i.e.,  $k \leq 3d$ ) and large  $k$  (i.e.,  $k > 3d$ ) respectively.

**Theorem A.3** (small  $k$ ). *Let  $A \in \mathbb{R}^{n \times d}$  and let  $k \leq 3d$ . There exists a set  $S \subset [n]$  of size  $O(d)$  such that for all  $x \in \mathbb{R}^d$ ,*

$$\|A|_S x\|_{\text{AT}_k} \leq \|Ax\|_{\text{AT}_k} \leq O(\sqrt{kd}) \cdot \|A|_S x\|_{\text{AT}_k},$$

where  $A|_S$  denotes the set of rows in  $A$  indexed by  $S$ .

**Theorem A.4** (large  $k$ ). Let  $A \in \mathbb{R}^{n \times d}$  and let  $k \geq k_0$  where  $k_0 = O(d + \frac{1}{\delta})$ . Let  $P_1, \dots, P_{\frac{k}{t}}$  be a random partition of  $[n]$  into  $\frac{k}{t}$  groups where  $t = O(d + \log \frac{1}{\delta})$ . For every  $i \in [\frac{k}{t}]$ , there exists a set  $S_i \subset N_i$  of size  $O(d)$  such that with probability at least  $1 - \delta$ , for all  $x \in \mathbb{R}^d$ ,

$$\|A|_{S_i} x\|_{\text{AT}_k} \leq \|Ax\|_{\text{AT}_k} \leq O(\sqrt{td}) \cdot \|A|_{S_i} x\|_{\text{AT}_k},$$

where  $S := \bigcup_{i \in [\frac{k}{t}]} S_i$  and  $A|_S$  denotes the set of rows in  $A$  indexed by  $S$ .

In both regimes, compared to the results of [Woodruff and Yasuda, 2023], our improved bounds  $\ell_2$ -volumetric spanner saves a factor of  $\log \log d$  in the number of rows and a factor of  $\sqrt{\log \log d}$  in the distortion. The proofs of above theorems respectively follows from Theorem 3.11 and 3.12 of [Woodruff and Yasuda, 2023] together with our Theorem 3.6.

#### A.4 Cascaded Norm Subspace Embedding

Next, we explore the implications of the improved bound of  $\ell_2$ -volumetric spanner (i.e., Theorem 3.6) for embedding a subspace of matrices under  $(\|\cdot\|_\infty, \|\cdot\|)$ -cascaded norm, which first evaluates an arbitrary norm of the rows and then return the maximum value over the  $n$  rows.

The following is a consequence of Theorem 3.13 in [Woodruff and Yasuda, 2023] and our Theorem 3.6. We describe our result for the  $(\|\cdot\|_\infty, \|\cdot\|)$ -cascaded norm, which first evaluates an arbitrary norm of rows and then return the maximum value over the  $n$  rows.

**Theorem A.5**  $(\|\cdot\|_\infty, \|\cdot\|)$ -subspace embedding). Let  $A \in \mathbb{R}^{n \times d}$  and let  $\|\cdot\|$  be any norm on  $\mathbb{R}^m$ . There exists a set  $S \subset [n]$  of size at most  $3d$  such that for every  $X \in \mathbb{R}^{d \times m}$ ,

$$\|A|_S X\|_{(\|\cdot\|_\infty, \|\cdot\|)} \leq \|AX\|_{(\|\cdot\|_\infty, \|\cdot\|)} \leq O(\sqrt{d}) \|A|_S X\|_{(\|\cdot\|_\infty, \|\cdot\|)}$$

## B Missing Proofs

### B.1 Proof of Lemma 3.1

*Proof.* In every iteration of the while loop, the determinant of the maintained  $M$  increases by at least a  $(1 + \delta)$  factor. Thus, suppose we define  $S^*$  to be the (multi-)set of  $[n]$  that maximizes  $\det(M^*)$ , where  $M^* := \sum_{i \in S^*} v_i v_i^T$ . We claim that for the  $S$  used by the algorithm at initialization (and the corresponding  $M$ ), we have

$$\det(M^*) \leq \binom{r}{d} d! \cdot \det(M). \quad (6)$$

This follows from two observations. First, let  $T^*$  be the (multi-)set of  $[n]$  that has size exactly  $d$ , and maximizes  $\det(\sum_{i \in T^*} v_i v_i^T)$ . Indeed, such a set will not be a multi-set, as a repeated element will reduce the rank. From the bound of Civril and Magdon-Ismail [2009], we have that at initialization,  $M$  satisfies

$$\det\left(\sum_{i \in T^*} v_i v_i^T\right) \leq d! \cdot \det(M).$$

Next, by the Cauchy-Binet formula, we can decompose  $\det(M^*)$  into a sum over sub-determinants of  $d$ -sized subsets of the columns. Thus there are  $\binom{r}{d}$  terms in the summation. Each such sub-determinant is at most  $\det(\sum_{i \in T^*} v_i v_i^T)$ , as  $T^*$  is the maximizer. This proves (6).

Next, since the determinant increases by a factor  $(1 + \delta)$  in every iteration, the number of iterations is at most

$$O\left(\frac{1}{\delta}\right) \cdot [d \log d + d \log(er/d)],$$

where we have used the standard bound of  $\binom{r}{d} \leq \left(\frac{er}{d}\right)^d$ . This completes the proof.  $\square$

471 **B.2 Proof of Lemma 3.2**

472 *Proof.* Note that the second part follows from the symmetry of  $M$  (and thus also  $M^{-1}$ ). To see the  
 473 first part, note that we can write  $v_i^T M^{-1} v_i = \langle M^{-1}, v_i v_i^T \rangle$ , where  $\langle U, V \rangle$  refers to the entry-wise  
 474 inner product between matrices  $U, V$ , which also equals  $\text{Tr}(U^T V)$ . Using this,

$$\sum_{i \in S} \tau_i = \sum_{i \in S} \langle M^{-1}, v_i v_i^T \rangle = \langle M^{-1}, M \rangle = \text{Tr}(I) = d.$$

475 In the last equality, we used the symmetry of  $M$ . □

476 **B.3 Proof of Theorem 3.10**

477 *Proof.* The proof follows from the same argument as before. Consider a set of  $n > r$  almost  
 478 orthonormal vectors  $X = \{v_1, \dots, v_n\} \subset \mathbb{R}^d$  from Lemma 3.7.

479 Consider an index  $i \in [n] \setminus S$  and let  $v_i = \sum_{j \in S} \alpha_j v_j$ . By Lemma 2.5, for any  $p > 1$ ,

$$\|\alpha\|_p \geq r^{\frac{1}{p}-1} \cdot \|\alpha\|_1 = r^{\frac{1}{p}-1} \cdot \frac{1}{c} \left( \frac{d}{\log n} \right)^{\frac{1}{2}}.$$

480 In particular, to get a 1-approximate  $\ell_p$ -volumetric spanner, i.e.,  $\|\alpha\|_p = 1$ , the spanning subset must  
 481 have size  $r = \Omega\left(\left(\frac{d}{\log n}\right)^{\frac{p}{2p-2}}\right)$ . □

482 **B.4 Proof of Theorem 3.11**

483 *Proof.* By Corollary 3.5, the local search outputs a set of vectors in  $X$  indexed by the set  $S \subset [n]$  of  
 484 size  $r > d$  such that for every  $i \in [n] \setminus S$ ,  $v_i$  can be written as a linear combination of the vectors in  
 485 the spanner,  $v_i = \sum_{j \in S} \alpha_j v_j$ , such that  $\|\alpha\|_2 \leq \left( \frac{d+r\delta}{r-d+1} \right)^{\frac{1}{2}}$ . By Lemma 2.5 and setting  $\delta = d/r$ ,  
 486 for any  $1 < p < 2$ ,

$$\|\alpha\|_p \leq r^{\frac{1}{p}-\frac{1}{2}} \cdot \left( \frac{d+r\delta}{r-d+1} \right)^{\frac{1}{2}} = O(r^{\frac{1}{p}-1} \cdot (d+r\delta)^{\frac{1}{2}}) = O(r^{\frac{1}{p}-1} \cdot d^{\frac{1}{2}}).$$

487 In particular, if we set  $r = O(d^{\frac{p}{2-2p}})$ , the subset of vectors  $S$  returned by LocalSearch-NR is an  
 488 (exact)  $\ell_p$ -volumetric spanner; i.e., for every  $i \in [n] \setminus S$ ,  $\|\alpha\|_p \leq 1$ .

489 Finally, the runtime analysis follows immediately from Lemma 3.1. □
